# Supplementary material for: Convex-hull mass estimates of the dodo (Raphus cucullatus): application of a CT-based mass estimation technique
Source: PeerJ. 2016 Jan 11;4:e1432. doi: 10.7717/peerj.1432 (PMC4715441; doi:10.7717/peerj.1432)
Supplement: Supplemental Information 1 [file peerj-04-1432-s001.docx]

**Supplementary Material**

**Convex-hull based volumetric mass estimates of the dodo (*Raphus cucullatus)***

Brassey, C.A.1*, O’Mahoney, T.1, Kitchener, A.C.2,3, Manning, P. L.4,5, Sellers, W.I.1

1Faculty of Life Sciences, University of Manchester, Manchester M13 9PL

2Department of Natural Sciences, National Museums Scotland, Edinburgh EH1 1JF

3 Institute of Geography, School of Geosciences, University of Edinburgh, Drummond Street, Edinburgh, EH8 9XP

4Interdisciplinary Centre for Ancient Life, School of Earth, Atmospheric and Environmental Sciences, University of Manchester, Manchester M13 9PL

5 Department of Geology and Environmental Geosciences, College of Charleston, Charleston, South Carolina, United States of America

*corresponding author ([charlotte.brassey@manchester.ac.uk](mailto:charlotte.brassey@manchester.ac.uk))

**Supplementary Material S1.** Raw convex hull volume data for extant pigeon dataset. Volume in mm3.

|  | **Trunk** | **Skull** | **Neck** | **RFem** | **RTbt** | **RTmt** | **RFoot** | **RHum** | **RRad** | **Rcmc** |
| --- | --- | --- | --- | --- | --- | --- | --- | --- | --- | --- |
| *Goura victoria* | 1090865 | 50856 | 16529 | 15072 | 35558 | 7182 | 26394 | 34486 | 27520 | 19456 |
| *Streptopelia decaocto** | 142130 | 13967 | 3400 | 1505 | 2866 | 644 | 3672 | 4944 | 5307 | 3555 |
| *Columba livia* | 82278 | 9627 | 1438 | 980 | 1676 | 281 | 1484 | 2413 | 2222 | 2275 |
| *Columba palumbus** | 246696 | 19861 | 5185 | 2626 | 5806 | 799 | 4686 | 6890 | 6542 | 5416 |
| *Ducula bicolor* | 245809 | 21472 | 7275 | 2495 | 5306 | 974 | 4923 | 7712 | 5772 | 4782 |
| *Petrophassa rufipennis* | 197999 | 22322 | 7440 | 3072 | 6074 | 1303 | 8562 | 7741 | 6446 | 4523 |
| *Otidiphaps nobilis* | 253579 | 15875 | 5521 | 4205 | 10353 | 1793 | 9403 | 4314 | 3505 | 2286 |
| *Nesoenas mayeri* | 135927 | 11378 | 4588 | 1843 | 3731 | 631 | 5385 | 4201 | 3208 | 3076 |
| *Ducula* sp*.* | 229009 | 19190 | 7010 | 2487 | 4692 | 700 | 4714 | 6693 | 5793 | 4489 |
| *Caloenas nicobarica* | 257958 | 20513 | 5398 | 4235 | 8763 | 1629 | 7959 | 10640 | 9006 | 7674 |
| *Phaps chalcoptera* | 154885 | 12942 | 2867 | 1926 | 3762 | 602 | 2447 | 5354 | 4014 | 3385 |
| *Ducula aenea* | 250110 | 24164 | 5620 | 3048 | 5974 | 1290 | 5390 | 7753 | 5943 | 4865 |
| *Columba guinea* | 65703 | 10968 | 1881 | 1019 | 2129 | 335 | 1769 | 3370 | 2537 | 2705 |
| *Zenaida graysoni* | 75854 | 7273 | 2044 | 808 | 1841 | 476 | 1789 | 2076 | 1539 | 1512 |
| *Gallicolumba* sp. | 115073 | 9750 | 1982 | 1496 | 3484 | 836 | 5639 | 2712 | 2450 | 2120 |
| *Phapitreron leucotis* | 49645 | 6930 | 981 | 634 | 1098 | 258 | 1260 | 1083 | 1011 | 728 |
| *Ptilinopus* sp*.* | 32488 | 5622 | 803 | 371 | 866 | 256 | 621 | 1014 | 821 | 548 |
| *Ptilinopus superbus* | 53345 | 8087 | 1370 | 641 | 1200 | 238 | 1333 | 1644 | 1203 | 1015 |
| [*Treron*](http://en.wikipedia.org/wiki/Treron)*vernans* | 72766 | 9588 | 2150 | 861 | 1639 | 280 | 1538 | 2235 | 2075 | 1641 |
| *Ocyphaps lophotes* | 42257 | 7159 | 1110 | 693 | 1549 | 351 | 1974 | 1384 | 1178 | 1570 |

**Supplementary Material S1. (cont.)**

|  | **LFem** | **LTbt** | **LTmt** | **LFoot** | **LHum** | **LRad** | **Lcmc** |
| --- | --- | --- | --- | --- | --- | --- | --- |
| *Goura victoria* | 14881 | 35955 | 8036 | 24009 | 33405 | 28321 | 18647 |
| *Streptopelia decaocto* | 1473 | 2879 | 629 | 3412 | 5127 | 4157 | 4201 |
| *Columba livia* | 848 | 1683 | 301 | 1387 | 2739 | 2212 | 2092 |
| *Columba palumbus* | 2460 | 5221 | 991 | 5027 | 7194 | 6522 | 6061 |
| *Ducula bicolor* | 2654 | 4810 | 1277 | 3233 | 7904 | 5821 | 5148 |
| *Petrophassa rufipennis* | 3128 | 1375 | 5948 | 8844 | 8153 | 6160 | 4414 |
| *Otidiphaps nobilis* | 5042 | 10125 | 2149 | 5726 | 4321 | 3422 | 2739 |
| *Nesoenas mayeri* | 2074 | 3943 | 660 | 5804 | 4497 | 3525 | 2690 |
| *Ducula* sp*.* | 2497 | 4871 | 724 | 4927 | 6685 | 5514 | 4982 |
| *Caloenas nicobarica* | 4293 | 8664 | 1632 | 8024 | 9974 | 9107 | 8260 |
| *Phaps chalcoptera* | 1719 | 3901 | 577 | 2564 | 5315 | 4479 | 3206 |
| *Ducula aenea* | 2859 | 5482 | 1031 | 5909 | 7818 | 6304 | 4699 |
| *Columba guinea* | 1017 | 1947 | 330 | 1346 | 3287 | 2241 | 2566 |
| *Zenaida graysoni* | 930 | 1862 | 416 | 1546 | 2076 | 1539 | 1512 |
| *Gallicolumba* sp*.* | 1682 | 3375 | 768 | 5988 | 2749 | 2264 | 2156 |
| *Phapitreron leucotis* | 511 | 1151 | 286 | 1076 | 1086 | 947 | 731 |
| *Ptilinopus* sp*.* | 393 | 872 | 294 | 560 | 831 | 853 | 596 |
| *Ptilinopus superbus* | 677 | 1249 | 180 | 1858 | 1578 | 1187 | 1070 |
| *Treron vernans* | 780 | 1704 | 301 | 1468 | 2126 | 2010 | 1822 |
| *Ocyphaps lophotes* | 726 | 1519 | 300 | 1466 | * | 1183 | 1588 |

*humerus badly damaged, right humerus mirrored instead

**Supplementary Material S2.** Results of phylogenetic generalised least squared (PGLS) regression analyses.

| Model | *a* | *a* (±95%) | *b* | *b* (±95%) | *r*2 | MSE | AIC |
| --- | --- | --- | --- | --- | --- | --- | --- |
| Eviscerated | -2.69 | -3.19- -2.34 | 0.96 | 0.89-1.05 | 0.97 | 0.009 | -20.97 |
| - minus feet | -2.67 | -3.14- -2.30 | 0.96 | 0.90-1.05 | 0.97 | 0.008 | -22.22 |
| Intact | -0.75 | -1.32- 0.04 | 0.60 | 0.45-0.70 | 0.91 | 0.008 | -10.15 |
| - minus feet | -0.72 | -1.30- 0.01 | 0.59 | 0.45-0.70 | 0.91 | 0.008 | -10.41 |
| Combined | -2.53 | -3.02- -1.97 | 0.93 | 0.84-1.03 | 0.94 | 0.013 | -26.64 |
| - minus feet | -2.51 | -3.13- -2.00 | 0.93 | 0.84-1.04 | 0.94 | 0.012 | -27.39 |

**Supplementary Material S2 continued**. Phylogeny used in PGLS analysis. Derived from Jetz et al. [28]


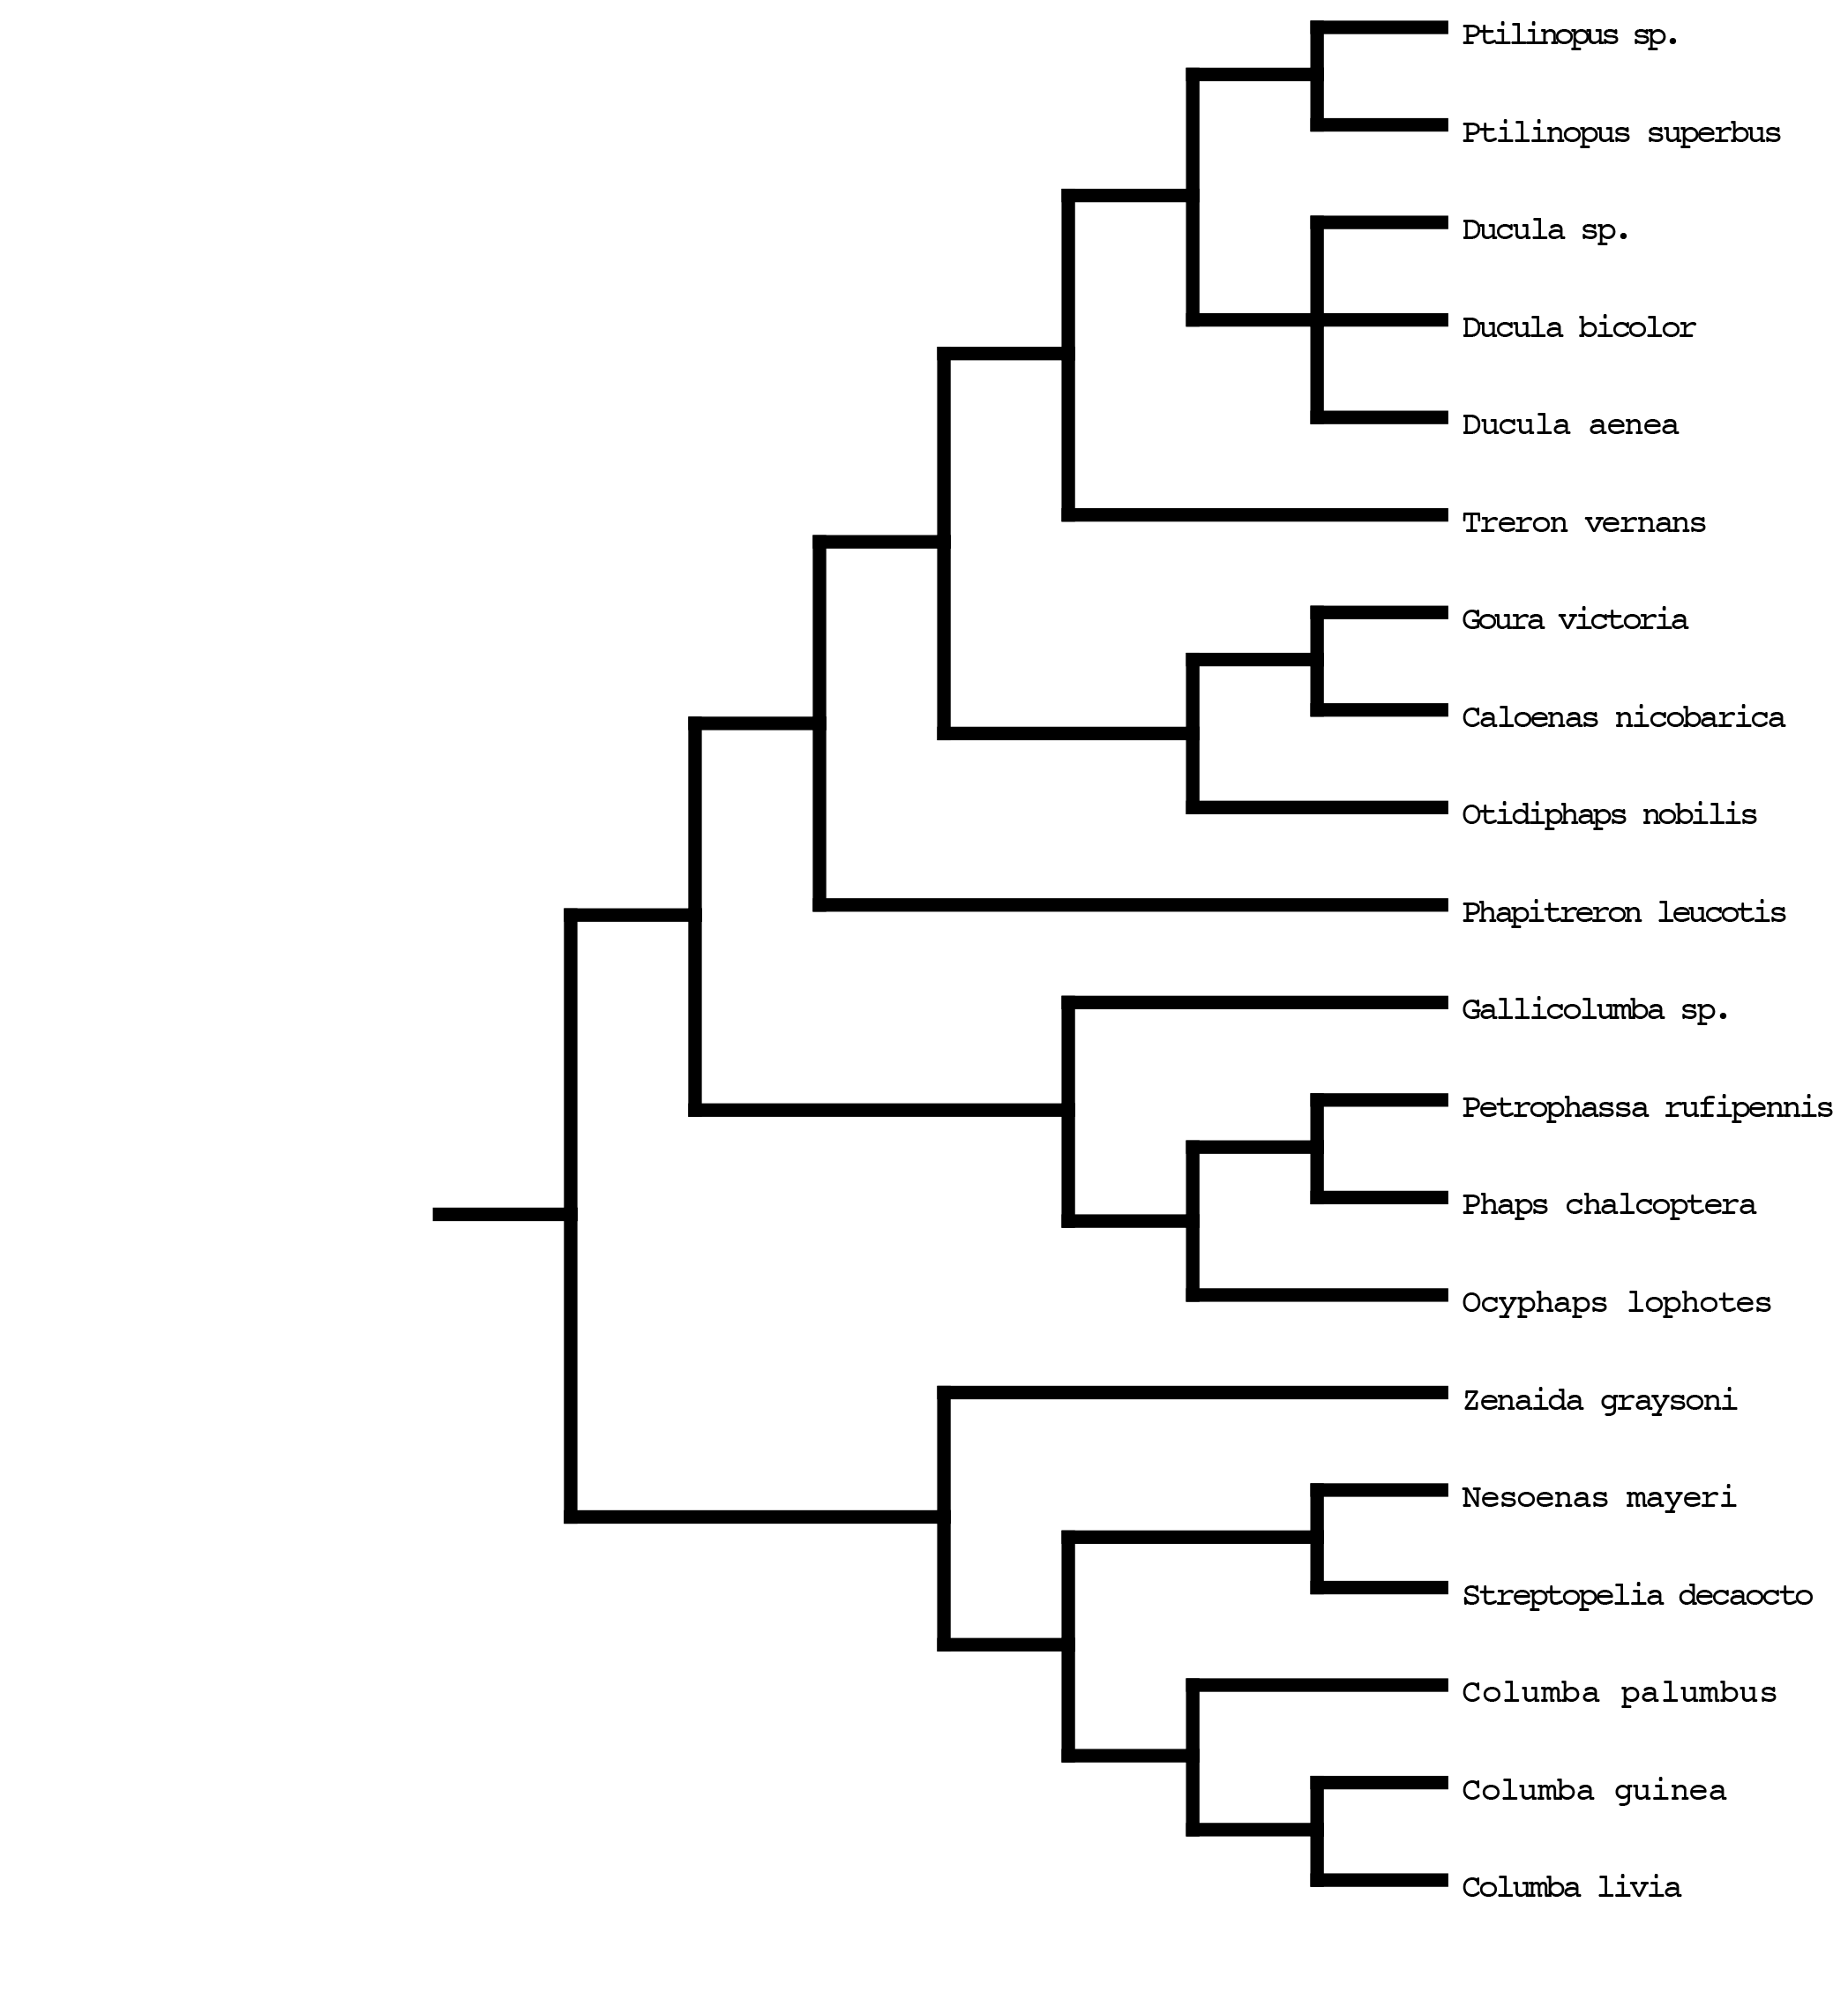


**Supplementary Material S3.** Raw convex hull volume data for dodo dataset. Volume in mm3.

|  | **Trunk** | **Skull** | **Neck** | **RFem** | **RTbt** | **RTmt** | **RFoot** | **RHum** | **RRad** | **Rcmc** |
| --- | --- | --- | --- | --- | --- | --- | --- | --- | --- | --- |
| NHMUK Kensington | 6953891 | 765172 | 434765 | 158901 | 321590 | 42267 | 317967 | 57545 | 14204 | * |
| NHMUK Tring | 6030985 | 839790 | 291411 | 178101 | 336612 | 50967 | 248958 | 51480 | 15910 | 6399 |
| Edinburgh | 9671000 | 788000 | 329000 | 140000 | 259000 | 72000 | 167000 | 24000 | 20000 | 8000 |

|  | **LFem** | **LTbt** | **LTmt** | **LFoot** | **LHum** | **LRad** | **Lcmc** |
| --- | --- | --- | --- | --- | --- | --- | --- |
| NHMUK Kensington | 142920 | 268549 | 52379 | 128606 | 56471 | 15141 | * |
| NHMUK Tring | 163822 | 352163 | 52348 | 248729 | 49864 | 17840 | 7441 |
| Edinburgh | 124000 | 237000 | 77000 | 193000 | 20000 | 14000 | 4000 |

*carpals not present in the NHMUK Kensington mount
